# Supplementary material for: Pseudotargeted lipidomics analysis of scoparone on glycerophospholipid metabolism in non-alcoholic steatohepatitis mice by LC-MRM-MS
Source: PeerJ. 2024 May 21;12:e17380. doi: 10.7717/peerj.17380 (PMC11122033; doi:10.7717/peerj.17380)
Supplement: File S1 [file peerj-12-17380-s004.xlsx]

## Sheet: Sheet1
	1D	2D	3D	4D	5D	6D	7D
Control	30.3	30.6	30.7	30.8	30.9	30.5	31
	31.4	31.7	31.2	30.2	30.4	29.9	31
	32.5	32.9	32.5	32.6	32.3	31.8	34
	29.2	29.7	29.5	29.2	29.1	28.7	30
	32.6	32.3	32.3	32.1	31.1	31.1	30
	30.1	30.6	30	30	29.8	29.6	29
	31.3	31.5	31.2	34.6	34.7	34.3	32	Mice weight
	35.7	36.9	37	36.9	36.4	36.4	36
NASH	41.4	42.1	42	42	46.5	47.6	47
	46.5	46.7	46.6	46.3	46.7	46.7	45
	41.8	41.8	40.8	40.7	41.7	41.4	40
	44.8	44.5	45.2	44.7	44.8	44.2	44
	42.3	42.6	42.2	42.3	42.3	41.9	40
	46	46	46.2	46.5	46.6	46.2	46
	44.6	45	45.6	45.5	45.1	45.5	45
	46.3	48.8	48.6	47.8	48.6	48.4	47
Scoparone	42.3	41.6	41.3	41.8	41.4	41.1	41
	39.9	40	39.5	39.3	39.1	38.4	37
	43.2	43.5	43.3	41.1	41	40.6	40
	43.2	42.8	42.1	42.9	42.1	42.1	39
	44.8	44.7	44.2	44.1	44.4	44.4	43
	42.9	43.1	43.1	43.3	43.6	43.3	42
	44.3	45.8	44.7	41.9	42.4	42.9	41
	44.1	44.3	44.8	44.2	44.3	44.2	42
Control	NASH	Scoparone
45.4472	101.875	53.7343
48.4718	156.034	63.9223	ALT
30.9411	66.3142	44.4609
36.9567	116.219	66.3142
30.9411	119.556	44.4609
49.502	75.0618	58.1472
39.691	103.415	50.5433
40.1431	92.9091	49.502
Control	NASH	Scoparone
38.399	84.2097	48.2916
45.0161	94.6334	33.0204	AST
31.0221	72.0109	34.0513
29.5765	56.1791	47.6224
32.0109	49.7156	35.6387
28.1744	79.5449	32.513
33.7	81.7455	46.9603
44.3818	79.7266	33.0204
Control	NASH	Scoparone
0.799456	0.737959	0.584218
0.753333	0.691837	0.476599	TG
0.768707	1.26068	0.476599
0.737959	0.707211	0.553469
0.722585	0.768707	0.44585
0.307483	1.29143	0.353605
0.691837	1.09156	0.517596
0.614966	0.876327	0.538095
