# Supplementary material for: Pseudotargeted lipidomics analysis of scoparone on glycerophospholipid metabolism in non-alcoholic steatohepatitis mice by LC-MRM-MS
Source: PeerJ. 2024 May 21;12:e17380. doi: 10.7717/peerj.17380 (PMC11122033; doi:10.7717/peerj.17380)
Supplement: File S2 [file peerj-12-17380-s005.xlsx]

## Sheet: NEG
Q1	Q3	RT	Name	DP	CE
407.2	153	2.4	LPA(16:1)	-90	-40
435.3	153	3.89	LPA(18:1)	-90	-40
433.2	153	2.55	LPA(18:2)	-90	-40
465.3	153	5.74	LPA(20:0)	-90	-40
463.3	153	4.91	LPA(20:1)	-90	-40
457.2	153	2.5	LPA(20:4)	-90	-40
510.3	450.3	1.36	LPC(14:1)	-90	-25
568.4	508.3	5.24	LPC(18:0)	-90	-25
424.2	227.2	1.81	LPE(14:0)	-90	-30
438.3	241.2	2.43	LPE(15:0)	-90	-30
452.3	255.2	3.24	LPE(16:0)	-90	-30
450.3	253.2	2.21	LPE(16:1)	-90	-30
466.3	269.2	4.38	LPE(17:0)	-90	-30
464.3	267.2	2.85	LPE(17:1)	-90	-30
480.3	283.3	5.22	LPE(18:0)	-90	-40
478.3	281.2	3.86	LPE(18:1)	-90	-40
476.3	279.2	2.61	LPE(18:2)	-90	-40
474.3	277.2	1.94	LPE(18:3)	-90	-40
508.3	311.3	6.18	LPE(20:0)	-90	-40
506.3	309.3	5.46	LPE(20:1)	-90	-40
504.3	307.3	4.48	LPE(20:2)	-90	-40
502.3	305.2	3.29	LPE(20:3)	-90	-40
500.3	303.2	2.42	LPE(20:4)	-90	-40
498.3	301.2	1.81	LPE(20:5)	-90	-40
536.4	339.3	7.02	LPE(22:0)	-90	-40
534.4	337.3	6.34	LPE(22:1)	-90	-40
532.3	335.3	5.73	LPE(22:2)	-90	-40
530.3	333.3	5.05	LPE(22:3)	-90	-40
528.3	331.3	4.17	LPE(22:4)	-90	-40
526.3	329.2	3.59	LPE(22:5)	-90	-40
524.3	327.2	2.38	LPE(22:6)	-90	-40
564.4	367.4	8.1	LPE(24:0)	-90	-40
562.4	365.3	7.06	LPE(24:1)	-90	-40
560.4	363.3	6.5	LPE(24:2)	-90	-40
481.3	253.2	1.74	LPG(16:1)	-90	-40
511.3	283.3	4.34	LPG(18:0)	-90	-40
505.3	277.2	1.68	LPG(18:3)	-90	-40
537.3	309.3	4.73	LPG(20:1)	-90	-40
535.3	307.3	3.88	LPG(20:2)	-90	-40
555.3	327.2	2.05	LPG(22:6)	-90	-40
571.3	255.2	2.15	LPI(16:0)	-90	-50
597.3	281.2	2.44	LPI(18:1)	-90	-50
595.3	279.2	1.6	LPI(18:2)	-90	-50
627.4	311.3	5.51	LPI(20:0)	-90	-50
625.3	309.3	4.4	LPI(20:1)	-90	-50
621.3	305.2	2.25	LPI(20:3)	-90	-50
619.3	303.2	1.63	LPI(20:4)	-90	-50
647.3	331.3	2.74	LPI(22:4)	-90	-50
496.3	153	2.15	LPS(16:0)	-90	-30
520.3	153	1.62	LPS(18:2)	-90	-30
552.3	153	5.55	LPS(20:0)	-90	-30
544.3	153	1.66	LPS(20:4)	-90	-30
542.3	153	1.4	LPS(20:5)	-90	-30
568.3	481.2	1.65	LPS(22:6)	-90	-30
675.5	255.2	11.71	PA(16:0/18:0)	-60	-50
673.5	255.2	10.31	PA(16:0/18:1)	-60	-50
703.5	255.2	13.21	PA(16:0/20:0)	-60	-50
701.5	255.2	11.95	PA(16:0/20:1)	-60	-50
695.5	255.2	9.1	PA(16:0/20:4)	-60	-50
693.4	255.2	8.3	PA(16:0/20:5)	-60	-50
731.6	255.2	14.4	PA(16:0/22:0)	-60	-50
703.5	283.3	13.07	PA(18:0/18:0)	-60	-50
731.6	283.3	14.37	PA(18:0/20:0)	-60	-50
727.5	283.3	12.17	PA(18:0/20:2)	-60	-50
749.5	283.3	10.78	PA(18:0/22:5)	-60	-50
747.5	283.3	10.13	PA(18:0/22:6)	-60	-50
727.5	281.2	12.04	PA(18:1/20:1)	-60	-50
725.5	281.2	10.89	PA(18:1/20:2)	-60	-50
719.5	281.2	8.45	PA(18:1/20:5)	-60	-50
747.5	281.2	9.53	PA(18:1/22:5)	-60	-50
747.5	279.2	8.69	PA(18:2/22:4)	-60	-50
749.5	311.3	10.53	PA(20:0/20:5)	-60	-50
750.5	227.2	9.24	PC(14:0/16:0)	-60	-50
748.5	227.2	8.29	PC(14:0/16:1)	-60	-55
776.5	227.2	9.41	PC(14:0/18:1)	-60	-55
774.5	227.2	8.54	PC(14:0/18:2)	-60	-55
772.5	227.2	7.82	PC(14:0/18:3)	-60	-55
778.6	255.2	10.62	PC(16:0/16:0)	-60	-55
776.5	255.2	9.44	PC(16:0/16:1)	-60	-50
806.6	255.2	12.18	PC(16:0/18:0)	-60	-50
804.6	255.2	10.74	PC(16:0/18:1)	-60	-50
802.6	255.2	9.73	PC(16:0/18:2)	-60	-50
800.5	255.2	8.92	PC(16:0/18:3)	-60	-50
834.6	255.2	13.58	PC(16:0/20:0)	-60	-50
832.6	255.2	12.24	PC(16:0/20:1)	-60	-50
830.6	255.2	11.03	PC(16:0/20:2)	-60	-50
828.6	255.2	10.15	PC(16:0/20:3)	-60	-50
826.6	255.2	9.55	PC(16:0/20:4)	-60	-50
824.5	255.2	8.78	PC(16:0/20:5)	-60	-50
862.7	255.2	14.72	PC(16:0/22:0)	-60	-50
860.6	255.2	13.59	PC(16:0/22:1)	-60	-50
858.6	255.2	12.41	PC(16:0/22:2)	-60	-50
856.6	255.2	11.42	PC(16:0/22:3)	-60	-50
854.6	255.2	10.46	PC(16:0/22:4)	-60	-50
852.6	255.2	9.54	PC(16:0/22:5)	-60	-50
850.6	255.2	9.13	PC(16:0/22:6)	-60	-50
774.5	253.2	8.48	PC(16:1/16:1)	-60	-50
802.6	253.2	9.62	PC(16:1/18:1)	-60	-50
800.5	253.2	8.72	PC(16:1/18:2)	-60	-50
798.5	253.2	8	PC(16:1/18:3)	-60	-50
830.6	253.2	10.93	PC(16:1/20:1)	-60	-50
828.6	253.2	9.83	PC(16:1/20:2)	-60	-50
826.6	253.2	8.98	PC(16:1/20:3)	-60	-50
824.5	253.2	8.56	PC(16:1/20:4)	-60	-50
822.5	253.2	7.87	PC(16:1/20:5)	-60	-50
852.6	253.2	9.38	PC(16:1/22:4)	-60	-50
848.5	253.2	8.3	PC(16:1/22:6)	-60	-50
834.6	283.3	13.54	PC(18:0/18:0)	-60	-50
832.6	283.3	12.35	PC(18:0/18:1)	-60	-55
830.6	283.3	11.21	PC(18:0/18:2)	-60	-55
828.6	283.3	10.21	PC(18:0/18:3)	-60	-55
862.7	283.3	14.67	PC(18:0/20:0)	-60	-55
860.6	283.3	13.53	PC(18:0/20:1)	-60	-55
858.6	283.3	12.52	PC(18:0/20:2)	-60	-55
856.6	283.3	11.6	PC(18:0/20:3)	-60	-55
854.6	283.3	10.98	PC(18:0/20:4)	-60	-55
852.6	283.3	10.07	PC(18:0/20:5)	-60	-50
888.7	283.3	14.69	PC(18:0/22:1)	-60	-50
884.6	283.3	12.81	PC(18:0/22:3)	-60	-50
882.6	283.3	12.05	PC(18:0/22:4)	-60	-50
878.6	283.3	10.62	PC(18:0/22:6)	-60	-50
830.6	281.2	10.98	PC(18:1/18:1)	-60	-50
828.6	281.2	9.92	PC(18:1/18:2)	-60	-55
826.6	281.2	9	PC(18:1/18:3)	-60	-55
858.6	281.2	12.39	PC(18:1/20:1)	-60	-55
856.6	281.2	11.22	PC(18:1/20:2)	-60	-55
854.6	281.2	10.29	PC(18:1/20:3)	-60	-55
852.6	281.2	9.68	PC(18:1/20:4)	-60	-55
850.6	281.2	8.92	PC(18:1/20:5)	-60	-55
886.7	281.2	13.64	PC(18:1/22:1)	-60	-55
884.6	281.2	12.62	PC(18:1/22:2)	-60	-55
882.6	281.2	11.83	PC(18:1/22:3)	-60	-55
880.6	281.2	10.72	PC(18:1/22:4)	-60	-55
878.6	281.2	9.72	PC(18:1/22:5)	-60	-55
876.6	281.2	9.37	PC(18:1/22:6)	-60	-55
826.6	279.2	8.92	PC(18:2/18:2)	-60	-55
854.6	279.2	10.16	PC(18:2/20:2)	-60	-50
852.6	279.2	9.27	PC(18:2/20:3)	-60	-50
850.6	279.2	8.78	PC(18:2/20:4)	-60	-50
848.5	279.2	8.06	PC(18:2/20:5)	-60	-50
874.6	279.2	8.47	PC(18:2/22:6)	-60	-50
882.6	311.3	12.5	PC(20:0/20:4)	-60	-50
690.5	227.2	10.95	PE(14:0/18:0)	-60	-45
690.5	255.2	10.88	PE(16:0/16:0)	-60	-45
688.5	255.2	9.74	PE(16:0/16:1)	-60	-45
718.5	255.2	12.41	PE(16:0/18:0)	-60	-45
716.5	255.2	11.04	PE(16:0/18:1)	-60	-45
714.5	255.2	9.96	PE(16:0/18:2)	-60	-45
746.6	255.2	13.68	PE(16:0/20:0)	-60	-45
744.6	255.2	12.47	PE(16:0/20:1)	-60	-45
742.5	255.2	11.33	PE(16:0/20:2)	-60	-45
740.5	255.2	10.41	PE(16:0/20:3)	-60	-45
738.5	255.2	9.8	PE(16:0/20:4)	-60	-45
736.5	255.2	9.03	PE(16:0/20:5)	-60	-45
774.6	255.2	14.83	PE(16:0/22:0)	-60	-45
772.6	255.2	13.8	PE(16:0/22:1)	-60	-45
770.6	255.2	13.16	PE(16:0/22:2)	-60	-45
766.5	255.2	10.82	PE(16:0/22:4)	-60	-45
764.5	255.2	9.84	PE(16:0/22:5)	-60	-45
762.5	255.2	9.45	PE(16:0/22:6)	-60	-45
686.5	253.2	8.67	PE(16:1/16:1)	-60	-45
714.5	253.2	9.83	PE(16:1/18:1)	-60	-45
712.5	253.2	8.94	PE(16:1/18:2)	-60	-45
710.5	253.2	8.22	PE(16:1/18:3)	-60	-45
742.5	253.2	11.27	PE(16:1/20:1)	-60	-45
740.5	253.2	10.07	PE(16:1/20:2)	-60	-45
738.5	253.2	9.02	PE(16:1/20:3)	-60	-45
736.5	253.2	8.77	PE(16:1/20:4)	-60	-45
734.5	253.2	8.12	PE(16:1/20:5)	-60	-45
766.5	253.2	8.82	PE(16:1/22:3)	-60	-45
764.5	253.2	8.48	PE(16:1/22:4)	-60	-45
746.6	283.3	13.8	PE(18:0/18:0)	-60	-45
744.6	283.3	12.57	PE(18:0/18:1)	-60	-50
742.5	283.3	11.51	PE(18:0/18:2)	-60	-50
774.6	283.3	14.56	PE(18:0/20:0)	-60	-50
772.6	283.3	13.7	PE(18:0/20:1)	-60	-50
770.6	283.3	12.74	PE(18:0/20:2)	-60	-45
768.6	283.3	11.89	PE(18:0/20:3)	-60	-45
766.5	283.3	11.3	PE(18:0/20:4)	-60	-45
764.5	283.3	10.35	PE(18:0/20:5)	-60	-45
800.6	283.3	14.8	PE(18:0/22:1)	-60	-45
796.6	283.3	13.34	PE(18:0/22:3)	-60	-45
794.6	283.3	12.32	PE(18:0/22:4)	-60	-45
792.6	283.3	11.88	PE(18:0/22:5)	-60	-45
790.5	283.3	10.9	PE(18:0/22:6)	-60	-45
742.5	281.2	11.3	PE(18:1/18:1)	-60	-45
740.5	281.2	10.19	PE(18:1/18:2)	-60	-50
738.5	281.2	9.21	PE(18:1/18:3)	-60	-50
770.6	281.2	12.63	PE(18:1/20:1)	-60	-50
768.6	281.2	11.51	PE(18:1/20:2)	-60	-50
766.5	281.2	10.3	PE(18:1/20:3)	-60	-50
764.5	281.2	9.99	PE(18:1/20:4)	-60	-50
762.5	281.2	9.2	PE(18:1/20:5)	-60	-45
798.6	281.2	13.91	PE(18:1/22:1)	-60	-45
796.6	281.2	13.36	PE(18:1/22:2)	-60	-45
794.6	281.2	12.1	PE(18:1/22:3)	-60	-45
792.6	281.2	11.04	PE(18:1/22:4)	-60	-45
788.5	281.2	9.62	PE(18:1/22:6)	-60	-45
738.5	279.2	9.11	PE(18:2/18:2)	-60	-45
736.5	279.2	8.41	PE(18:2/18:3)	-60	-45
762.5	279.2	9.01	PE(18:2/20:4)	-60	-45
760.5	279.2	8.23	PE(18:2/20:5)	-60	-45
790.5	279.2	9.88	PE(18:2/22:4)	-60	-45
786.5	279.2	8.69	PE(18:2/22:6)	-60	-45
747.5	255.2	9.56	PG(16:0/18:1)	-60	-50
745.5	255.2	8.7	PG(16:0/18:2)	-60	-50
775.5	255.2	10.86	PG(16:0/20:1)	-60	-50
769.5	255.2	8.58	PG(16:0/20:4)	-60	-50
767.5	255.2	7.65	PG(16:0/20:5)	-60	-50
775.5	283.3	11.01	PG(18:0/18:1)	-60	-50
773.5	283.3	9.92	PG(18:0/18:2)	-60	-50
805.6	283.3	13.15	PG(18:0/20:0)	-60	-50
799.5	283.3	10.15	PG(18:0/20:3)	-60	-50
797.5	283.3	9.78	PG(18:0/20:4)	-60	-50
821.5	283.3	9.5	PG(18:0/22:6)	-60	-50
769.5	281.2	7.6	PG(18:1/18:3)	-60	-50
801.6	281.2	11.14	PG(18:1/20:1)	-60	-50
767.5	279.2	7.45	PG(18:2/18:3)	-60	-50
817.5	279.2	7.29	PG(18:2/22:6)	-60	-50
807.5	255.2	8.14	PI(16:0/16:1)	-60	-60
835.5	255.2	9.22	PI(16:0/18:1)	-60	-60
833.5	255.2	8.3	PI(16:0/18:2)	-60	-60
831.5	255.2	7.8	PI(16:0/18:3)	-60	-60
857.5	255.2	8.25	PI(16:0/20:4)	-60	-60
855.5	255.2	7.63	PI(16:0/20:5)	-60	-60
885.5	255.2	9.01	PI(16:0/22:4)	-60	-60
883.5	255.2	8.31	PI(16:0/22:5)	-60	-60
881.5	255.2	8.01	PI(16:0/22:6)	-60	-60
865.6	283.3	11.71	PI(18:0/18:0)	-60	-60
863.6	283.3	10.43	PI(18:0/18:1)	-60	-60
861.5	283.3	9.53	PI(18:0/18:2)	-60	-60
891.6	283.3	11.8	PI(18:0/20:1)	-60	-60
887.6	283.3	9.86	PI(18:0/20:3)	-60	-60
885.5	283.3	9.36	PI(18:0/20:4)	-60	-60
883.5	283.3	8.66	PI(18:0/20:5)	-60	-60
913.6	283.3	10.27	PI(18:0/22:4)	-60	-60
909.5	283.3	9.09	PI(18:0/22:6)	-60	-60
859.5	281.2	8.52	PI(18:1/18:2)	-60	-60
885.5	281.2	8.79	PI(18:1/20:3)	-60	-60
883.5	281.2	8.4	PI(18:1/20:4)	-60	-60
911.6	281.2	9.15	PI(18:1/22:4)	-60	-60
907.5	281.2	8.1	PI(18:1/22:6)	-60	-60
758.5	255.2	8.55	PS(16:0/18:2)	-60	-55
790.6	255.2	11.8	PS(16:0/20:0)	-60	-55
788.5	255.2	10.67	PS(16:0/20:1)	-60	-55
784.5	255.2	8.87	PS(16:0/20:3)	-60	-55
782.5	255.2	8.44	PS(16:0/20:4)	-60	-55
780.5	255.2	7.82	PS(16:0/20:5)	-60	-55
818.6	255.2	13.19	PS(16:0/22:0)	-60	-55
808.5	255.2	8.49	PS(16:0/22:5)	-60	-55
788.5	283.3	10.85	PS(18:0/18:1)	-60	-55
786.5	283.3	9.7	PS(18:0/18:2)	-60	-55
816.6	283.3	12.23	PS(18:0/20:1)	-60	-55
814.6	283.3	11.06	PS(18:0/20:2)	-60	-55
812.5	283.3	10.15	PS(18:0/20:3)	-60	-55
810.5	283.3	9.61	PS(18:0/20:4)	-60	-55
808.5	283.3	8.85	PS(18:0/20:5)	-60	-55
838.6	283.3	10.65	PS(18:0/22:4)	-60	-55
834.5	283.3	9.3	PS(18:0/22:6)	-60	-55
786.5	281.2	9.7	PS(18:1/18:1)	-60	-55
784.5	281.2	8.7	PS(18:1/18:2)	-60	-55
814.6	281.2	10.9	PS(18:1/20:1)	-60	-55
808.5	281.2	8.55	PS(18:1/20:4)	-60	-55
806.5	281.2	8	PS(18:1/20:5)	-60	-55
836.5	281.2	9.11	PS(18:1/22:4)	-60	-55

## Sheet: POS
Q1	Q3	RT	Name	DP	CE
468.3	184.1	2	LPC(14:0)	230	35
494.3	184.1	2.37	LPC(16:1)	230	35
510.4	184.1	4.63	LPC(17:0)	230	35
508.3	184.1	3.19	LPC(17:1)	230	35
522.4	184.1	4.19	LPC(18:1)	230	35
518.3	184.1	2.13	LPC(18:3)	230	35
538.4	184.1	5.91	LPC(19:0)	230	35
552.4	184.1	6.32	LPC(20:0)	230	35
550.4	184.1	5.6	LPC(20:1)	230	35
548.4	184.1	4.7	LPC(20:2)	230	35
546.4	184.1	3.65	LPC(20:3)	230	35
542.3	184.1	2.15	LPC(20:5)	230	35
580.4	184.1	7.13	LPC(22:0)	230	35
578.4	184.1	6.39	LPC(22:1)	230	35
576.4	184.1	5.9	LPC(22:2)	230	35
574.4	184.1	5.19	LPC(22:3)	230	35
572.4	184.1	4.45	LPC(22:4)	230	35
570.4	184.1	3.9	LPC(22:5)	230	35
568.3	184.1	2.89	LPC(22:6)	230	35
608.5	184.1	8.17	LPC(24:0)	230	35
606.4	184.1	7.3	LPC(24:1)	230	35
604.4	184.1	6.6	LPC(24:2)	230	35
482.4	104.1	4.11	LPC(O-16:0)	100	35
510.4	104.1	5.72	LPC(O-18:0)	100	35
508.4	104.1	4.63	LPC(O-18:1)	100	35
538.4	104.1	6.6	LPC(O-20:0)	100	35
536.4	104.1	5.87	LPC(O-20:1)	100	35
566.5	104.1	7.53	LPC(O-22:0)	100	35
564.4	104.1	6.67	LPC(O-22:1)	100	35
594.5	104.1	8.7	LPC(O-24:0)	100	35
592.5	104.1	7.56	LPC(O-24:1)	100	35
590.5	104.1	6.83	LPC(O-24:2)	100	35
480.3	104.1	4.06	LPC(P-16:0)	100	35
676.5	313.3	11.85	PE(16:0p/16:0)	90	25
674.5	311.3	10.64	PE(16:0p/16:1)	90	25
704.6	341.3	13.25	PE(16:0p/18:0)	90	25
702.5	339.3	12.04	PE(16:0p/18:1)	90	25
700.5	337.3	10.83	PE(16:0p/18:2)	90	25
698.5	335.3	10.21	PE(16:0p/18:3)	90	25
730.6	364.2	13.31	PE(16:0p/20:1)	90	25
726.5	363.3	11.45	PE(16:0p/20:3)	90	25
724.5	361.3	10.59	PE(16:0p/20:4)	90	25
722.5	359.3	9.63	PE(16:0p/20:5)	90	25
752.6	364.2	11.72	PE(16:0p/22:4)	90	25
750.5	364.2	11.2	PE(16:0p/22:5)	90	25
748.5	364.2	10.17	PE(16:0p/22:6)	90	25
704.6	313.3	13.25	PE(18:0p/16:0)	90	25
702.5	311.3	12.23	PE(18:0p/16:1)	90	25
732.6	341.3	14.41	PE(18:0p/18:0)	90	25
730.6	339.3	13.41	PE(18:0p/18:1)	90	25
728.6	337.3	12.4	PE(18:0p/18:2)	90	25
726.5	335.3	11.65	PE(18:0p/18:3)	90	25
760.6	369.3	15.16	PE(18:0p/20:0)	90	25
758.6	367.3	14.45	PE(18:0p/20:1)	90	25
756.6	365.3	13.69	PE(18:0p/20:2)	90	25
754.6	363.3	12.9	PE(18:0p/20:3)	90	25
752.6	361.3	12.17	PE(18:0p/20:4)	90	25
750.5	359.3	11.15	PE(18:0p/20:5)	90	25
780.6	389.3	13.13	PE(18:0p/22:4)	90	25
776.6	385.3	11.75	PE(18:0p/22:6)	90	25
702.5	313.3	12.02	PE(18:1p/16:0)	90	25
730.6	341.3	13.39	PE(18:1p/18:0)	90	25
728.6	339.3	12.24	PE(18:1p/18:1)	90	25
726.5	337.3	11.26	PE(18:1p/18:2)	90	25
758.6	369.3	15.21	PE(18:1p/20:0)	90	25
756.6	367.3	13.46	PE(18:1p/20:1)	90	25
752.6	363.3	11.61	PE(18:1p/20:3)	90	25
750.5	361.3	10.82	PE(18:1p/20:4)	90	25
748.5	359.3	9.81	PE(18:1p/20:5)	90	25
778.6	389.3	11.93	PE(18:1p/22:4)	90	25
776.6	387.3	11.43	PE(18:1p/22:5)	90	25
774.5	385.3	10.36	PE(18:1p/22:6)	90	25
724.5	337.3	9.89	PE(18:2p/18:2)	90	25
748.5	361.3	9.65	PE(18:2p/20:4)	90	25
772.5	385.3	9.49	PE(18:2p/22:6)	90	25
