# Supplementary material for: Pseudotargeted lipidomics analysis of scoparone on glycerophospholipid metabolism in non-alcoholic steatohepatitis mice by LC-MRM-MS
Source: PeerJ. 2024 May 21;12:e17380. doi: 10.7717/peerj.17380 (PMC11122033; doi:10.7717/peerj.17380)
Supplement: File S3 [file peerj-12-17380-s006.xlsx]

## Sheet: NEG
Lipid	LPA(16:1)	LPA(18:1)	LPA(18:2)	LPA(20:0)	LPA(20:1)	LPA(20:4)	LPC(14:1)	LPC(18:0)	LPE(14:0)	LPE(15:0)	LPE(16:0)	LPE(16:1)	LPE(17:0)	LPE(17:1)	LPE(18:0)	LPE(18:1)	LPE(18:2)	LPE(18:3)	LPE(20:0)	LPE(20:1)	LPE(20:2)	LPE(20:3)	LPE(20:4)	LPE(20:5)	LPE(22:0)	LPE(22:1)	LPE(22:2)	LPE(22:3)	LPE(22:4)	LPE(22:5)	LPE(22:6)	LPE(24:0)	LPE(24:1)	LPE(24:2)	LPG(16:1)	LPG(18:0)	LPG(18:3)	LPG(20:1)	LPG(20:2)	LPG(22:6)	LPI(16:0)	LPI(18:1)	LPI(18:2)	LPI(20:0)	LPI(20:1)	LPI(20:3)	LPI(20:4)	LPI(22:4)	LPS(16:0)
m/z	407.2	435.3	433.2	465.3	463.3	457.2	510.3	568.4	424.2	438.3	452.3	450.3	466.3	464.3	480.3	478.3	476.3	474.3	508.3	506.3	504.3	502.3	500.3	498.3	536.4	534.4	532.3	530.3	528.3	526.3	524.3	564.4	562.4	560.4	481.3	511.3	505.3	537.3	535.3	555.3	571.3	597.3	595.3	627.4	625.3	621.3	619.3	647.3	496.3
Retention time	2.4	3.89	2.55	5.74	4.91	2.5	1.36	5.24	1.81	2.43	3.24	2.21	4.38	2.85	5.22	3.86	2.61	1.94	6.18	5.46	4.48	3.29	2.42	1.81	7.02	6.34	5.73	5.05	4.17	3.59	2.38	8.1	7.06	6.5	1.74	4.34	1.68	4.73	3.88	2.05	2.15	2.44	1.6	5.51	4.4	2.25	1.63	2.74	2.15
QC1	200.501	400.729	387.718	535.192	148.874	626.16	19.2884	108895	76.8332	38.0089	40854.6	3196.46	469.782	133.37	28627.4	24645.7	1828.72	96.4945	330.986	743.846	140.989	545.774	6362.88	40.9661	11.3399	36.3283	6.08926	6.34574	171.714	154.21	2072.68	4.29226	3.59808	5.23357	483.639	52.4844	62.5272	84.5731	54.9607	119.807	13366.8	9181.48	1044.68	985.214	261.013	3287.81	18219.4	337.543	2221.95
QC2	280.063	320.76	360.681	430.484	159.859	559.465	24.4058	117209	77.2448	35.7923	37158.5	3378.8	491.525	131.494	32335.6	23469.9	1805.56	90.7518	347.861	803.679	154.605	527.322	6666.67	39.9361	9.77199	42.3662	6.40143	8.14328	163.409	153.991	2121.2	3.6691	3.87966	5.32614	529.314	50.3496	57.6436	83.65	53.4517	122.256	13627.3	9234.02	1037.3	1010.78	272.608	3297.74	17200.5	208.981	2626.92
QC3	356.954	399.26	396.616	473.295	140.864	601.555	18.4852	113608	78.9602	43.4311	40684.2	3551.91	527.211	157.903	34732	25593.3	2941.73	98.6952	388.471	832.555	180.891	615.337	6775.96	43.4618	11.1849	46.5333	7.3224	8.96175	194.223	173.614	2063.12	3.57143	4.23453	5.10204	421.83	57.8781	44.4295	91.6758	53.0493	102.717	12080.1	8464.3	1301.23	1293.11	381.699	3542.02	17659.7	264.081	2426.23
QC4	203.081	376.211	363.327	442.363	169.364	580.077	23.7511	106801	67.0203	47.0263	43408.9	3119.58	503.002	182.306	33886	28424.1	2012.53	87.6605	378.8	912.558	181.841	658.742	8135.15	39.8123	9.97931	46.4746	5.68472	8.82036	201.253	169.339	1914.18	3.44248	3.90285	6.15098	389.486	53.8529	46.0519	93.586	46.8112	133.409	12853.9	12536.1	1322.21	1111.29	343.875	2554.69	21616.6	356.446	2230.28
C-1	212.406	275.477	332.096	353.109	107.607	336.901	19.5726	91942.1	65.5047	46.5897	39203.9	2420.55	650.289	95.38	30228.4	13855.7	1150.72	102.122	369.563	463.75	90.93	276.379	4133.13	46.8384	10.8974	32.7869	4.52952	5.68528	96.5354	67.2963	1619.5	3.89423	3.99164	3.61973	507.32	50.5845	61.6795	53.7766	28.1296	83.5375	16358.8	10432.6	1275.76	943.695	352.487	1724.83	15120.7	285.698	3102.27
C-2	135.092	505.358	493.187	263.219	172.939	466.405	21.5311	97626.8	121.568	69.2981	55385.8	5537.1	668.082	185.54	33109.3	29572.5	3374.08	182.93	513.656	816.043	165.195	732.883	8191.43	82.2914	15.2348	50.1998	5.27112	8.98693	228.975	166.06	2666.9	4.06053	4.43884	3.20303	574.474	0	52.4134	85.9431	44.6514	139.177	15906.8	8773.96	1327.64	1781.59	393.322	2644.66	14176	193.951	3640.07
C-3	149.891	290.688	371.81	454.422	104.103	391.619	25.265	101975	129.915	70.2541	55187.9	5150.95	720.777	131.356	31628.7	21509.9	2032.35	169.541	586.812	682.877	133.657	507.081	6097.94	66.5318	16.9062	53.3613	6.54121	9.74328	174.376	174.585	3163.65	4.59115	5.09952	6.71407	660.417	0	60.6624	51.1518	33.2132	73.9774	15386.8	8299.11	1314.2	1292	342.356	1608.84	14492.8	168.248	2636.8
C-4	147.614	338.989	391.36	343.119	136.477	446.936	25.2941	81168.8	88.8158	40.8521	38923.5	3088.82	481.696	94.2774	26649.7	14640.1	1198.84	86.0465	400.834	521.179	108.974	329.622	4558.6	50	17.1339	45.417	5.11782	10.1344	129.074	93.107	1429.51	6.42782	4.67888	6.3622	505.717	37.1741	42.5313	66.8254	33.9925	101.022	16818.5	10564.7	1445.05	1090.46	279.018	3498.61	16805	344.531	3699.17
C-5	225.91	277.889	371.851	407.837	179.316	417.097	27.5694	103551	101.574	39.6346	46846.4	4716.55	444.341	124.599	30363	21912.9	1451.51	98.4522	456.767	747.899	13.9147	438.198	5686.12	63.8989	17.1808	51.8381	5.34895	9.28337	147.197	152.7	1932.41	5.65789	4.91391	5.83488	699.525	0	57.6707	86.9568	40.5924	103.538	12006.8	8056.76	889.851	1693.54	373.049	3002.34	11750.5	217.365	4508.2
C-6	0	248.447	251.27	320.741	140.097	296.114	36.4299	104425	134.676	49.8931	53966	5808.7	547.697	143.646	28977.3	25381.2	2440.11	147.477	550	884.74	151.466	617.018	5583.99	84.6111	17.8689	64.5082	6.72697	8.57843	182.101	177.664	2224.52	5.76797	5.68106	7.93974	677.368	39.7464	58.2474	55.2867	33.3793	87.6594	15132.7	11074.9	1297.17	1413.98	411.184	4390.59	17305.8	454.805	3543.3
C-7	253.954	335.408	263.046	278.969	156.82	360.331	42.3991	92743.4	129.742	49.9088	44810.6	6099.89	659.738	183.685	32450.8	26608.9	2736.76	175.372	350.055	978.186	198.379	654.717	7083.83	87.9104	16.0417	66.6715	8.41859	14.0367	229.359	246.843	2164.34	5.44123	6.38481	8.54185	719.991	52.367	73.6735	107.131	51.7325	118.664	14188.2	12377	2013.07	1034.92	464.823	3056.62	17822.2	500.852	3067.15
C-8	0	422.435	322.139	272.529	0	417.345	0	62285.1	47.5817	28.1112	25543.7	1769.07	223.155	62.4298	15487.3	10138.8	1468.35	0	144.987	249.614	40.7352	312.347	3974.85	30.6065	5.33817	14.6635	2.48785	4.49617	106.867	87.1731	1055.59	2.21889	2.01332	1.31727	193.524	49.0477	0	74.1215	37.9077	74.5741	12111.6	6447.81	1114.35	1134.18	344.869	2620.79	12690.5	202.761	1520.34
M-1	314.032	0	334.821	461.066	0	0	11.8215	111977	37.5429	19.3918	27066.4	1568.27	304.878	90.1093	28678.9	18323.9	1025.61	30.2972	254.231	615.105	52.5123	450.437	5379.98	14.6653	6.24274	24.6806	2.6656	4.46357	131.027	122.987	1165.87	2.11915	2.10582	2.19912	0	0	0	76.6985	41.1663	133.696	12592.1	9178.12	757.471	964.881	243.705	3208.43	17520.4	290.825	1731.88
M-2	192.593	356.954	359.598	668.506	150.485	649.351	17.9888	137816	75.4148	45.1421	53211.3	2871.28	974.745	149.168	50509.5	27030.4	1476.5	65.5321	1014.64	1275.3	228.893	615.134	6106.87	26.4159	23.0361	67.6419	6.08915	7.46799	170.191	195.97	2982.91	4.56339	4.87013	5.64526	567.615	0	61.3835	64.5802	54.3834	106.521	21677.6	13960	1206.9	1914.65	369.7	2934.05	25956	463.863	4730.93
M-3	249.104	480.877	315.952	590.023	273.945	905.594	28.9715	130169	68.3767	29.9417	40644.9	2956.83	476.836	142.213	34713.7	29196.6	1350.4	57.113	169.09	969.172	222.703	552.093	6943.5	25.7491	7.53898	38.7977	6.62362	11.721	279.632	216.307	2204.21	4.59446	4.87575	5.97796	697.525	0	95.4927	146.141	130.478	326.262	17800.8	19930.8	1247.58	745.828	507.498	3000.37	20414.6	568.099	3263.93
M-4	0	0	330.962	485.617	209.471	522.402	17.3831	118274	51.5348	30.9772	37216.8	2014.9	528.372	124.104	41856	23355	1697.37	51.6841	448.565	1012.3	193.129	675.325	6459.02	21.5092	11.4284	42.2246	6.62361	13.1	176.393	181.639	2193.74	0	3.78377	4.28163	0	0	0	105.718	54.3873	101.517	16670.9	11958.6	926.79	1270.02	303.998	3230.48	20155.8	493.313	2213.96
M-5	0	385.791	511.841	325.94	0	625.366	15.3272	87628.6	46.482	22.5995	31030.4	1450.97	379.673	77.3616	30798.6	16641	1037.8	31.8146	291.099	564.389	111.114	518.623	4798.74	10.5222	8.5491	22.9815	3.68913	5.37536	142.915	144.654	1216.78	3.43595	2.94967	2.23751	527.035	0	73.5756	202.504	86.9952	218.579	12376.7	5910.82	491.172	943.191	237.454	1502.38	12113.2	197.54	2100.84
M-6	107.029	0	315.107	391.207	101.494	364.116	23.4786	117864	98.4452	53.938	51057.8	3314.33	661.438	171.471	38436.5	29614	1771.55	89.6039	556.066	888.158	190.228	683.389	6430.18	27.5268	16.1564	48.6731	7.9082	12.013	187.034	206.537	2999.37	0	4.56393	4.38033	276.86	0	34.8535	52.8281	48.7638	90.611	16228.1	10206.3	1128.63	1349.67	244.775	3660.62	23116	249.493	3026.1
M-7	324.29	440.18	459.643	1150.18	398.636	788.131	18.4165	109715	72.8512	32.5733	37892.7	2486.16	451.375	121.129	31061.3	22508.5	1534.13	61.9522	480.71	630.252	126.146	570.033	6860.96	23.2289	12.6957	37.2242	5.1399	4.83528	159.85	116.342	1620.04	4.12557	3.30631	4.55021	313.265	0	0	62.1273	34.3507	90.9875	14456.2	8684.19	838.347	1576.46	336.109	2817.21	19162.3	360.392	2712.97
M-8	215.268	0	412.901	1051.45	0	738.859	17.7955	108621	44.2972	34.4894	30080.2	1797.83	253.334	102.51	17705	17140.8	1215.15	44.6766	215.451	421.879	72.9986	388.139	4789.09	16.0954	5.64906	17.2529	2.82291	2.77705	132.402	86.9419	1246.88	2.22745	1.9775	1.88194	292.419	28.778	0	36.6284	24.1431	122.89	10599.4	6417.26	538.041	1362.29	273.757	2444.78	13514.3	288.637	2294.3
T-1	338.857	411.846	477.979	775.02	210.602	640.663	12.4095	115756	40.0045	23.4788	30964.4	1921.99	404.197	119.355	29267	21857.9	2276.87	59.3556	207.075	556.49	114.251	420.875	4829.58	25.3023	5.38806	19.9528	3.87033	3.85705	119.134	121.929	1437.72	2.18886	1.89819	2.35425	285.61	38.7604	40.6843	53.5263	38.6812	124.485	8939.33	8553.6	758.402	765.677	249.425	2178.18	12253.3	241.772	1414.41
T-2	0	397.505	363.196	464.553	0	306.41	12.0277	87964.8	31.1525	24.4832	28473.4	1223.77	375.115	60.2164	25788.5	10534.9	1191.85	33.6465	268.431	307.686	63.4338	211.407	2635.81	13.5544	7.01754	11.9835	1.13124	1.49084	60.4628	51.5661	886.245	2.20248	1.50485	1.06929	217.155	44.3328	0	37.5173	35.3905	107.104	10861.2	4527.39	501.373	866.76	148.239	1520.41	9868.21	132.755	1371.67
T-3	0	0	312.767	483.845	0	506.128	12.8458	84403.5	28.7636	15.9079	20386.6	1029.43	269.934	52.4581	18721.3	8616.09	817.351	24.1241	216.84	306.954	63.4769	175.562	2409.73	10.7782	5.578	11.7978	1.43919	1.67199	48.8681	35.9821	504.118	2.61151	1.22951	1.05795	231.715	37.5918	38.0515	52.3326	26.5094	111.786	11786.6	7716.82	714.094	1060.71	242.206	2246.87	10683.1	227.665	1308.59
T-4	0	243.258	241.142	617.572	0	448.261	15.181	82562.6	47.8148	29.9579	32949.9	1503.36	209.893	78.2716	13598	12034.5	1222.62	42.0301	142.108	223.801	40.7637	286.211	3373.45	19.5254	3.49739	9.01391	1.93933	1.60671	84.9048	66.9004	799.63	1.0909	1.00405	1.02282	284.396	33.0226	34.0626	36.97	26.4556	80.7942	15410.1	8160.54	858.666	986.821	233.957	3147.14	16780.7	171.819	1662.68
T-5	115.698	245.334	310.782	338.277	0	493.77	15.6111	91604.8	35.6441	35.0224	30799.8	1301.06	585.394	76.4955	33596.8	13512.2	1695.88	67.4369	394.868	383.464	76.8354	345.256	4644.81	21.8971	12.0521	23.1508	4.49227	3.52908	109.318	54.6729	1203.82	3.41615	2.60586	2.48242	166.063	53.2787	0	48.2504	34.6084	79.4834	17304.2	6696.67	1012.54	1443.97	196.242	2788.95	20053.5	199.227	1450.8
T-6	167.603	293.477	362.261	460.851	125.368	512.517	17.0946	104131	61.1777	49.1269	42973.1	2398.21	584.416	153.522	34653.5	25951.8	2777.18	87.075	263.158	582.4	140.306	572.174	6503.63	29.0918	6.90555	25.5933	3.61827	5.14052	165.547	160.172	2038.24	3.06626	2.45463	3.43228	238.367	51.2369	36.9955	65.2027	46.2814	68.0769	11429.9	8516.73	799.693	685.3	202.574	2913.11	19415.6	249.132	1646.44
T-7	0	0	378.788	522.162	0	664.452	18.6505	96987.7	36.7635	31.3716	31843.4	1432.4	455.085	105.219	27219	17806.4	1037.09	38.1365	229.262	524.851	134.702	372.771	4429.03	15.1853	6.24923	19.3517	2.32489	3.79626	97.4026	77.0812	986.041	3.34169	2.12325	2.2287	269.321	43.518	55.6945	70.2729	38.3338	106.85	8313.98	8844.4	608.339	625.055	241.821	2931.28	15524.9	271.944	1320.5
T-8	0	210.413	252.316	299.464	0	333.157	0	76292.9	24.2689	22.0825	24177.9	905.375	296.498	52.3079	21679.6	9161.73	1237.07	34.0175	227.988	252.701	54.145	227.503	3628.57	14.9716	6.06165	10.716	0	1.9459	74.3872	46.3451	733.554	1.89526	1.48735	1.07806	0	38.3401	0	45.5951	29.274	104.789	11398.3	4978.26	444.878	726.405	165.878	1828.22	16501	227.219	1064.88
[truncated: 216 more columns]

## Sheet: POS
Lipid	LPC(14:0)	LPC(16:1)	LPC(17:0)	LPC(17:1)	LPC(18:1)	LPC(18:3)	LPC(19:0)	LPC(20:0)	LPC(20:1)	LPC(20:2)	LPC(20:3)	LPC(20:5)	LPC(22:0)	LPC(22:1)	LPC(22:2)	LPC(22:3)	LPC(22:4)	LPC(22:5)	LPC(22:6)	LPC(24:0)	LPC(24:1)	LPC(24:2)	LPC(O-16:0)	LPC(O-18:0)	LPC(O-18:1)	LPC(O-20:0)	LPC(O-20:1)	LPC(O-22:0)	LPC(O-22:1)	LPC(O-24:0)	LPC(O-24:1)	LPC(O-24:2)	LPC(P-16:0)	PE(16:0p/16:0)	PE(16:0p/16:1)	PE(16:0p/18:0)	PE(16:0p/18:1)	PE(16:0p/18:2)	PE(16:0p/18:3)	PE(16:0p/20:1)	PE(16:0p/20:3)	PE(16:0p/20:4)	PE(16:0p/20:5)	PE(16:0p/22:4)	PE(16:0p/22:5)	PE(16:0p/22:6)	PE(18:0p/16:0)	PE(18:0p/16:1)	PE(18:0p/18:0)
m/z	468.3	494.3	510.4	508.3	522.4	518.3	538.4	552.4	550.4	548.4	546.4	542.3	580.4	578.4	576.4	574.4	572.4	570.4	568.3	608.5	606.4	604.4	482.4	510.4	508.4	538.4	536.4	566.5	564.4	594.5	592.5	590.5	480.3	676.5	674.5	704.6	702.5	700.5	698.5	730.6	726.5	724.5	722.5	752.6	750.5	748.5	704.6	702.5	732.6
Retention time	2	2.37	4.63	3.19	4.19	2.13	5.91	6.32	5.6	4.7	3.65	2.15	7.13	6.39	5.9	5.19	4.45	3.9	2.89	8.17	7.3	6.6	4.11	5.72	4.63	6.6	5.87	7.53	6.67	8.7	7.56	6.83	4.06	11.85	10.64	13.25	12.04	10.83	10.21	13.31	11.45	10.59	9.63	11.72	11.2	10.17	13.25	12.23	14.41
QC1	2010.79	30699.4	6211.55	865.584	62058.2	3113.02	2457.88	3677.35	3956.02	1786.02	15056	1749.81	240.089	292.208	44.6074	70.6054	758.157	1647.65	33169	366.695	91.4582	23.4685	1176.97	587.777	1997.26	365.687	43.1019	107.656	67.8896	40.4531	59.2752	9.05673	46.2404	858.704	274.785	59.5238	6773.18	1566.69	38.0214	1077.1	3133.51	84829.6	437.023	32935.2	6181.57	45912.8	490.288	224.824	28.9357
QC2	2000.4	30501.1	6173.45	888.362	61028.3	2960.76	2340.76	3731.34	3630.06	1663.76	15252.2	1681.97	206.089	285.458	41.3517	66.281	877.588	1650.87	29007.2	360.493	83.1906	22.6663	1195.78	604.122	1881.82	327.053	41.1342	104.131	63.445	38.9038	56.0313	8.56374	48.3607	817.473	284.489	58.4609	6619.12	1556.4	44.8374	1092.59	3293.33	86846.2	455.699	31859.9	6391.49	45621.9	457.577	212.585	27.5372
QC3	1859.62	29666.4	6408.58	847.198	58516.5	2855.17	2325.62	3770.7	3555.97	1752.1	14215	1618.71	222.049	300.113	43.0219	69.0433	830.699	1578.36	28337.3	374.493	93.1639	25.0807	1161.25	630.126	2055.69	330.688	47.5673	109.138	67.6456	43.1635	59.9358	9.19421	45.7281	835.99	294.525	57.1672	7313.24	1531.03	50.2253	1156.1	3363.34	86875.4	461.372	35800.1	6359.83	46951.6	456.392	216.943	31.9459
QC4	1960.96	29524.7	6101.06	884.434	60034.3	2882.82	2350.65	3528.18	3566	1732.16	14750.2	1604.05	224.668	288.153	42.3356	66.9764	863.238	1608.06	28792	381.95	93.491	24.2319	1190.77	654.893	2028.05	349.839	39.9696	110.698	69.435	42.8154	60.8348	9.41878	50.3859	885.936	276.637	61.2972	7317.65	1568.07	49.8931	1145.17	3389.51	88462.3	486.302	33361.6	6609.07	46480	479.924	220.215	32.6677
C-1	2192.75	32573.3	7575.51	1040.85	58181.2	4818.43	3718.57	4926.11	3292.12	1472.92	11522.5	3028.09	272.955	324.639	41.7508	61.9815	582.035	1310.48	30209.2	419.839	98.6826	22.4784	1189.55	678.14	1957.61	0	50.1436	124.773	73.4071	46.7577	73.8916	11.5104	32.0258	802.589	314.317	49.3506	6167.21	2077.01	66.4495	1157.89	2264.48	74561.4	522.876	22987	4294.37	42273.2	391.285	262.237	24.4517
C-2	3320.78	51148.7	5752.03	1098.17	69391.4	5632.27	3675.51	4245.26	5448.27	1420.98	15009.3	3274.01	195.811	303.493	39.2287	66.3523	939.012	1567.02	39327.8	315.746	74.9703	18.6703	1454.52	670.049	1541.76	457.325	59.7196	101.468	80.5246	34.2114	61.1343	8.66036	56.2377	974.179	368.198	59.184	7123.03	1943.12	0	1222.8	2961.37	87133.3	567.171	30346.3	5918.4	49375.5	535.95	257.278	32.0009
C-3	3830.69	53955.5	8311.07	1100.38	73120	6804.83	3921.88	5906.35	4525.85	1953.09	14870.2	3722.69	279.769	394.581	49.1716	89.8097	1062.95	1971.77	36737.9	461.099	108.318	25.2613	1414.78	687.113	2109.04	401.851	47.3808	104.083	71.2213	39.8724	57.146	7.69135	48.6563	966.106	307.201	66.7011	5561	1545.03	59.5393	1097.76	2425.23	75203	503.999	27338.1	6153.41	49321.2	488.515	252.713	31.2453
C-4	2797.46	46473.5	4938.96	948.727	66292.3	4959.98	2448.55	3201.95	3709.41	1599.22	15109.3	3574.03	241.969	305.365	40.4047	72.5497	745.156	1809.67	34419.1	390.652	88.8858	19.6133	1307.13	612.851	1630.28	404.047	39.7989	115.103	55.8856	45.8798	58.3526	8.5938	45.9245	1054.12	334.614	77.9714	6910	1994.28	76.4245	1343.02	3138.62	76013.4	617.278	29586.1	5974.29	45739.1	561.033	272.014	36.2065
C-5	3478.04	52594.7	6345.03	1171.54	82170.6	3961.05	3154.23	5267.42	5223.4	2109.67	16542.6	3276.15	302.105	461.704	50.8008	87.7761	960.013	1936.3	37955.5	446.172	116.917	29.9441	1594.6	684.073	2478.78	386.491	54.3617	134.205	76.2762	50.0297	74.0678	9.88546	50.0319	1127.87	414.125	68.8744	8740.25	2258.35	71.9596	1634.58	3421.65	77678.2	674.151	29779.9	6937.1	48771.5	571.013	270.813	28.7875
C-6	4292.47	68010.2	7420.19	1353.59	83948	5753.74	3623.81	4909.78	6302.75	2563.78	19401.4	4311.64	264.334	424.347	52.4899	102.084	1042.54	755.128	39988.7	409.894	106.843	29.2572	1318.06	584.449	2100.21	0	44.2269	110.597	64.0835	43.9121	66.0631	8.93246	64.0415	955.476	341.966	66.9776	8006.72	1951.51	68.1252	1527.79	3688.49	74447.9	643.587	29874	6693.18	43363.5	471.8	241.409	30.6043
C-7	4347.92	57961.9	6618.38	1404.34	87334.2	5545.82	3171.83	3900.44	7049.17	2797.96	18592.7	4259.19	264.845	468.41	59.6903	124.043	871.149	2873.29	40284.4	435.146	130.307	33.5435	1362.16	673.392	2227.83	452.935	0	119.88	74.0267	47.952	72.1624	8.96191	70.5631	817.376	324.195	50.9712	6566.56	1902.73	62.5006	1414.2	3010.3	68431.3	580.167	26725.4	6320.71	38230.3	430.337	236.316	27.228
C-8	1250.69	13260.6	3357.5	417.365	33325.6	2099.83	1576.29	2261.98	1607.82	703.758	6905.84	1196.39	209.946	165.215	24.6608	47.21	463.393	1226.2	21036.7	377.412	78.2041	15.5265	0	544.028	1429.74	270.823	33.9504	97.7301	51.4549	46.4797	59.5089	8.19672	14.084	953.635	340.13	45.5606	6246.27	2037.09	0	1171.61	3004.76	81658.8	540.393	26747.2	7084.15	45865.3	563.099	261.062	30.8589
M-1	994.779	14163.9	4085.89	552.129	47974.4	1215.93	1425.52	3043.16	2525.97	1129.31	13892.7	521.008	148.458	183.323	27.164	44.191	630.934	1526.95	23640.7	237.573	55.5477	15.7632	997.463	476.818	1510.65	259.525	25.9761	84.6979	42.0935	32.1264	43.1163	6.04659	27.4387	709.159	177.479	41.5243	4457.4	834.611	24.547	666.439	2492.62	73289.9	296.918	25021.6	5220.02	31942.5	360.337	123.035	24.0089
M-2	2261.32	34397	8632.3	1106.06	73002.5	2898.89	3482.75	5575.95	5302.99	2321.65	19909.1	1093.05	200.89	328.093	52.282	65.5738	948.055	1902.35	40869.4	314.48	71.1306	23.917	1259.94	724.638	2116.48	473.588	0	113.249	77.5323	47.7548	50.6929	9.04814	52.1828	713.375	169.52	59.3602	4740.49	996.835	29.6688	812.586	2943.26	78207.9	317.284	29847.7	5553.06	38409	438.848	153.419	37.464
M-3	1594.06	27632	5312.19	856.281	72549.9	2414.9	1517.91	1642.98	3844.72	1827.47	18675	1054.2	161.247	206.716	48.148	93.1446	1378.57	2267.71	34252.3	332.467	91.3733	24.2176	1586.69	886.4	2999.23	537.46	62.6176	119.144	106.054	42.4122	63.8706	12.9515	60.4191	1057.59	220.503	59.7245	7029.89	1186.15	34.5009	1142.71	3254.83	91396.5	470.039	38500.4	6702.41	41060.6	563.265	167.011	32.1716
M-4	1138.87	18106.9	4749.79	656.495	53093.4	1713.13	1730.46	3730.06	3579.67	1481.98	17074.8	658.29	165.101	252.807	43.6282	63.0123	886.907	1730.17	27635.5	258.709	72.319	19.2964	1234.52	567.794	2381.44	0	37.456	94.3037	57.8328	33.1671	41.2116	6.80499	49.4554	715.122	160.171	44.3292	4741.21	1063.62	28.1192	614.448	2559.33	71824.8	286.467	25468.8	5068.8	31529.9	354.401	166.991	25.3429
M-5	906.104	11614.2	3127.92	414.277	42472.1	1073.57	1272.44	1935.99	3109.34	837.599	11713.5	269.693	126.415	141.778	27.7908	44.6042	659.353	274.095	21058.3	231.046	55.6596	14.7541	1083.22	503.424	1607.92	275.974	36.1436	101.93	56.5575	39.8635	49.8829	7.42389	29.1351	704.589	192.75	41.0604	6093.48	1251.26	31.5656	856.79	3220	70458.9	351.355	28982.1	5073.04	37296.3	380.316	196.466	20.2341
M-6	2372.27	33025.7	8362.92	1019.95	68599.6	3100.19	2919.87	5884.19	4322.92	2170.58	16063.9	1054.27	276.324	356.419	57.285	73.2179	1037.98	1960.62	33969.2	462.98	93.937	29.1164	1378.65	804.267	2409	489.961	48.1541	117.117	75.5553	51.2389	53.1305	9.394	62.7729	907.064	205.592	72.8613	5429.23	1256.47	32.7879	948.268	3610.92	93057.5	381.795	36615.6	7736.76	47944.6	550.026	210.398	42.9249
M-7	1707.27	21319.8	5635.8	820.107	56333.6	2013.49	1956.83	4683.51	2851.4	1426.67	15846.2	656.316	249.142	281.828	46.2561	59.0164	697.159	1369.6	27472.5	422.955	83.8281	25.7022	1277.79	543.182	1798.85	336.73	31.4577	100.133	49.712	45.2525	40.9367	7.20428	122.492	1200.77	550.518	104.197	14456.5	2017.29	0	1072.42	3621.26	102789	495.902	36094.9	7017.48	50221.1	624.866	266.452	57.0755
M-8	1401.31	20203	5644.44	701.099	53217.5	1765.27	2000.91	3590.46	3213.49	1611.4	12983.3	652.495	222.413	268.359	44.5506	55.1193	655.047	1314.36	27414.8	394.933	82.3679	25.4479	1273.81	650.54	2121.34	387.481	45.6408	138.307	72.7867	61.43	58.8474	9.68703	54.63	914.595	243.313	75.8087	6667.85	1206.12	35.7407	1155.76	2988.38	93112.6	381.037	36850.6	6584.66	45925.4	630.138	233.348	48.3927
T-1	1233.71	20106.9	6661.64	774.226	56914.7	2030.73	2067.15	2868.85	2973.94	1860.03	13535.1	855.263	179.571	197.719	38.0143	64.831	702.414	1584.93	28667.5	340.285	69.1138	18.0883	876.973	530.322	1828.5	337.327	34.5816	104.743	53.4882	39.856	52.6482	8.21183	53.4969	575.058	154.23	42.7798	4263.95	832.091	19.8947	623.061	2053.82	73273.7	237.671	23826.3	4153.92	30924	328.697	192.085	24.3004
T-2	784.527	11642.4	4534.54	481.209	35860.8	1327.91	1534.37	2917.24	1820.53	905.953	8516.69	517.44	205.058	134.599	25.5418	36.8071	454.169	172.112	20637.8	389.129	60.0518	15.1855	0	531.459	1384.14	251.792	27.4265	92.5767	44.6261	39.0854	45.6254	7.92045	35.5119	771.456	191.195	49.7267	5502.2	1419.17	29.6028	798.365	2704.69	78213.1	358.124	29351.7	5656.99	40957.2	428.434	151.077	25.1548
T-3	908.875	14511.9	3882.38	545.71	38916	1106.83	1591.39	3406.99	2597.4	1221.15	11626.9	636.844	216.216	170.235	22.6252	33.6277	462.189	1037.22	17575	378.378	63.7447	14.4851	648.619	453.668	1019.05	258.788	22.6273	108.284	43.4205	42.0027	42.1799	5.23704	30.2023	738.846	203.746	53.642	6129.72	1089.32	25.2781	854.459	2946.07	85055.8	358.28	29413.2	5720.82	37199.6	393.845	178.632	27.6209
T-4	1306.51	17056.8	4348.38	654.07	42699.2	1740.14	1836.15	3396.48	2037.24	1102.54	12593.7	937.583	234.76	155.181	23.3965	31.3544	596.695	1136.28	21670.2	397.542	63.9106	15.3379	895.612	497.374	1182.07	324.152	28.5975	113.848	46.3081	45.5197	48.3049	6.86638	25.7638	673.002	182.763	48.3223	5545.42	1135.13	27.6391	906.309	2790.95	67289.9	342.087	29798.9	5008.77	37252.7	411.417	200.31	32.6277
T-5	804.696	10103.6	5111.58	483.57	34169.6	1829.02	1705.37	3270.65	1408.52	1205.53	8936.76	629.047	204.114	155.898	25.7192	36.4443	541.383	871.456	24142.4	338.812	57.5695	15.0891	0	477.338	1125.04	276.438	25.0723	79.3344	43.8302	39.0724	37.1311	5.64203	32.8054	719.989	249.9	60.9756	7047.18	1854.26	48.3806	1163.35	3103.22	91666	348.432	30885	4755.7	47331.1	453.853	185.707	36.9778
T-6	1423.86	22335.1	7330.83	914.994	55852.6	2401.99	2269.2	2838.65	2717.86	1708.37	12295.1	747.936	229.836	215.073	40.0718	62.3178	661.224	1453.06	26121.6	480.027	90.3248	22.887	1158.79	713.546	2157.03	411.184	42.9137	105.947	69.8052	46.7645	55.7276	7.63245	51.2289	824.324	230.566	63.864	6134.97	1442.93	34.5343	1309.66	3243.49	88716.5	356.175	32973	6235.54	47370	573.268	216.735	49.2809
T-7	1288.22	22065.8	4817.43	859.852	59877.4	1681.2	1975.19	2283.11	3488.29	1644.74	14978.2	739.422	178.157	166.383	27.7613	37.1841	628.415	1374.16	23625.8	378.771	72.6851	16.2972	878.201	443.278	1190.86	235.723	0	91.6197	43.117	37.6564	43.9516	5.50055	39.2796	792.709	212.527	54.29	6481.13	1314.67	30.7043	1204.31	3571.43	85438.1	317.589	31505.3	6363.24	42515.5	493.416	207.075	41.1979
T-8	514.128	7825.36	3663.89	418.175	29044.5	1089.95	1370.57	3175.79	1388.81	659.109	6910.71	384.055	237.74	133.497	24.4369	26.0764	434.243	738.722	18142.6	426.913	69.8239	18.7176	0	510.615	1348.26	225.115	24.7415	80.3547	44.4325	38.6993	38.8784	6.40509	21.7122	766.088	181.034	55.7193	5553.72	1479.15	37.3312	999.263	2845.83	80585.7	332.934	31693.5	5078.14	42590.8	457.744	154.586	23.881
[truncated: 26 more columns]
